# Supplementary material for: The Evolution of the KANADI Gene Family and Leaf Development in Lycophytes and Ferns
Source: MDPI journal article supplement (doi:10.3390/plants8090313), 2019-08-30
Supplement: s1 [file s1]

ISH primers *Selaginella moellendorffii*:

1 10 20 30 40 50 60 70  
. SM\_KAN1 translation M E I S N A A A A P A L L L P D L S L Q I S P P C S T S K A A P S P A A S S G L T D H Q L W T T T R P L S S S S G T V E L S K S S P P R S S I N S  
. SM\_KAN2 translation M E M P I R L L A I P A E P D L S L R I S T P P A I R G G G S H H D G T S A F E I W K K S G A S S S S S D C S S S N Y S P R G E H H H P E A V E A S  
. SM\_KAN3 translation M N R R K Q D H S V P D L S L Q I S P P S T G K S T P M A T Y Q K N Y Q E F D L W S R A Q H N S S S S V S D N S S N S T C G S E R W C R E A A A A

80 90 100 110 120 130 140  
. SM\_KAN1 translation A A S S S L A S D N S S S N S S G G E T S I Q L S L G S R Y F N A L G G A D K N R P V G A D D A E R K P S K V P L F G E D R S F S S R L D S T D S  
. SM\_KAN2 translation T E L S L G R S F F Y R A H S S G I D H H H H H A S M H A A R S D R N S S I D G L F R I G M R S S S P D G D H Y P R Q G I D F L S R A P A Y G L  
. SM\_KAN3 translation P P S T L S L G A N P L F R A T P P S P S F K S S I R S S S E S Y A A A L E A S R P G F A V Y S S S S S H I P A A Q S F Q N L R I A N E D A H C

150 160 170 180 190 200 210 220 230 240 250 260 270 280 290  
. SM\_KAN1 translation K A E Q H K A S F V Q F S S S C S T S H H H R Q Q Q L Q Q V L Q R Y S S P A M M N L Y Q S G F S S V R M S N G A V A P P P P T T T T T T T T T T D G S L  
. SM\_KAN2 translation R F A P V T E I T Q E H H D P A P A V G N S S H S G H C Q E Q Q K I E K M G G S E N S Q R E S I V V S A P S Q Q R S R I I S K L P V K I R S A R  
. SM\_KAN3 translation R S A D A S T R N S F H A F Y S H A F G Y G D Q S G G A G Q A G H L V A T Y S N A A G G L Q Q Q Q Q Q Q Q Q Q H Q A Y S S S F H R L L H N R E I G L P N

220 230 240 250 260 270 280 290  
. SM\_KAN1 translation S A L F D A S S S S C G S S V P T P L I A G N A A T S S L R S R Y I S K F P V K R N V R A P R M R W T S T L H A H F V H A V E L L G G H E R A T P  
. SM\_KAN2 translation A Q R M R W T S N L H A H F V K A V E R L G G H E R A T P K T V L E L M N V K E L T L A H V K S H L Q M Y R T V K T T D K A T L T E K N M E I M A  
. SM\_KAN3 translation I L S A V N S T S Y D S R D Y H Q R R Y T P S L Q E I L Q G R S P Q Q G R Y M E L A E N A G I T L S T L T R S I A Q Q H E A H T G S S N L R S Q

300 310 320 330 340 350 360  
. SM\_KAN1 translation K S V L E L M N V K D L T L A H V K S H L Q M Y R T V K T T D K S A S T D H V S S V E M R K M D D P K L M Q W K P E A V Q P R Y S D E P A L Q S R  
. SM\_KAN2 translation E E A Q S P N S S S S G R D D W S N T R C N T N V R L V G Q L E A G E L G K H D E L S S L G N L V P K R A T V A A V Q W L G S  
. SM\_KAN3 translation F M P R L P T K R S M R A R R M R W T S T L H A H F V H A V E L L G G H E R A T P K S V L E L M N V K D L T L A H V K S H L Q M Y R T I K T T D K

370 380 390 400 410 420 430 440 450 460 469  
. SM\_KAN1 translation C P R S Q E V V P R P S F S D G L W Q Q H M K Q T S H G A M K I E D G L Q Q R Q F S A T T L S Q L M S S R M S H M I P K V P S L E F T L G R P G Y  
. SM\_KAN2 translation A S S S S G A T N D A T S S G S L E S L N A R K S S E Q V A W H D P E R S K T R M E E G R S S G W E A C D H E E H E E E D E D L P G K K K Q S K P P  
. SM\_KAN3 translation A S S S S G A T N D A T S S G S L E S L N A R K S S E Q V A W H D P E R S K T R M E E G R S S G W E A C D H E E H E E E D E D L P G K K K Q S K P P

440 450 460 469  
. SM\_KAN1 translation H L A E H S E A P P P Q E L L L L R C  
. SM\_KAN2 translation  
. SM\_KAN3 translation C P E L S L G R S S W D D P P P S P P S S E G E E L M L L K C

| Gene              | Species                                                    | Family        | Accession number       | Database  |
|-------------------|------------------------------------------------------------|---------------|------------------------|-----------|
| <i>ArlyKAN1</i>   | <i>Arabidopsis lyrata</i> (L.) O'Kane & Al-Shehbaz         | Brassicaceae  | XM_021022418           | NCBI      |
| <i>AtKAN1</i>     | <i>Arabidopsis thaliana</i> (L.) Heynh.                    | Brassicaceae  | At5g16560              | NCBI      |
| <i>ArhaKAN2</i>   | <i>Arabidopsis halleri</i> (L.) O'Kane & Al-Shehbaz        | Brassicaceae  | Araha.2690s0004.1      | Phytozome |
| <i>AtKAN2</i>     | <i>Arabidopsis thaliana</i> (L.) Heynh.                    | Brassicaceae  | At1g32240              | NCBI      |
| <i>AtKAN3</i>     | <i>Arabidopsis thaliana</i> (L.) Heynh.                    | Brassicaceae  | At4g17695              | NCBI      |
| <i>ArlyKAN2</i>   | <i>Arabidopsis lyrata</i> (L.) O'Kane & Al-Shehbaz         | Brassicaceae  | AL1G46380.t1           | Phytozome |
| <i>ArhaKAN3</i>   | <i>Arabidopsis halleri</i> (L.) O'Kane & Al-Shehbaz        | Brassicaceae  | Araha.450750021        | Phytozome |
| <i>ArlyKAN3</i>   | <i>Arabidopsis lyrata</i> (L.) O'Kane & Al-Shehbaz         | Brassicaceae  | AL7G36890.t1           | Phytozome |
| <i>Lybakan3</i>   | <i>Lycium barbarum</i> L.                                  | Solanaceae    | LWCK_scaffold_20128041 | OneKP     |
| <i>LybaKAN3.2</i> | <i>Lycium barbarum</i> L.                                  | Solanaceae    | LWCK_scaffold_20128031 | OneKP     |
| <i>LyspKA2/3</i>  | <i>Lycium</i> sp. L.                                       | Solanaceae    | OSMU_scaffold_20775471 | OneKP     |
| <i>SolaKAN2/3</i> | <i>Solanum lasiophyllum</i> Humb. & Bonpl. ex Dunal        | Solanaceae    | DLAI_scaffold_20168201 | OneKP     |
| <i>TsheKAN</i>    | <i>Tsuga heterophylla</i> (Raf.) Sarg.                     | Pinaceae      | GAMH_scaffold_20502891 | OneKP     |
| <i>ArspKAN</i>    | <i>Araucaria</i> sp. Juss.                                 | Araucariaceae | ACWS_scaffold_20705791 | OneKP     |
| <i>LafriKAN</i>   | <i>Lagarostrobos franklinii</i> (Hook. f.) Quinn           | Podocarpaceae | ZQWM_scaffold_20857481 | OneKP     |
| <i>JuscKAN</i>    | <i>Juniperus scopulorum</i> Sarg.                          | Cupressaceae  | XMGP_scaffold_20580761 | OneKP     |
| <i>FohoKAN</i>    | <i>Fokienia hodginsii</i> (Dunn) A. Henry & H.H. Thomas    | Cupressaceae  | UEVI_scaffold_20615841 | OneKP     |
| <i>ChlaKAN</i>    | <i>Chamaecyparis lawsoniana</i> (A. Murray) Parl.          | Cupressaceae  | AIGO_scaffold_20111741 | OneKP     |
| <i>TotaKAN</i>    | <i>Torreya taxifolia</i> Arn.                              | Taxaceae      | EFMS_scaffold_20786011 | OneKP     |
| <i>TabaKAN</i>    | <i>Taxus baccata</i> L.                                    | Taxaceae      | WWSS_scaffold_20062611 | OneKP     |
| <i>AgroKAN</i>    | <i>Agathis robusta</i> (C. Moore ex F. Muell.) F.M. Bailey | Araucariaceae | MIXZ_scaffold_20107471 | OneKP     |
| <i>AtATS</i>      | <i>Arabidopsis thaliana</i> (L.) Heynh.                    | Brassicaceae  | At5g42630              | NCBI      |
| <i>ArhaATS</i>    | <i>Arabidopsis halleri</i> (L.) O'Kane & Al-Shehbaz        | Brassicaceae  | Araha.21611s0001.1     | phytozome |
| <i>CisiATS</i>    | <i>Citrus sinensis</i> Pers.                               | Rutaceae      | orange1.1g018802m      | Phytozome |
| <i>CiclATS</i>    | <i>Citrus clementina</i> hort.                             | Rutaceae      | Ciclev10001679m        | Phytozome |
| <i>SolyATS</i>    | <i>Solanum lycopersicum</i> L.                             | Solanaceae    | Solyc04g079600.2.1     | Phytozome |
| <b>Ferns</b>      |                                                            |               |                        |           |
| <i>EdiKAN1</i>    | <i>Equisetum diffusum</i> D.Don                            | Equisetaceae  | CAPN_2002682           | OneKP     |

|                 |                                                   |               |                              |       |
|-----------------|---------------------------------------------------|---------------|------------------------------|-------|
| <i>EdiKAN2</i>  | <i>Equisetum diffusum</i> D.Don                   | Equisetaceae  | CAPN_2001900                 | OneKP |
| <i>EdiKAN3</i>  | <i>Equisetum diffusum</i> D.Don                   | Equisetaceae  | CAPN_2002684                 | OneKP |
| <i>EdiKAN4</i>  | <i>Equisetum diffusum</i> D.Don                   | Equisetaceae  | CAPN_2003191                 | OneKP |
| <i>EdiKAN5</i>  | <i>Equisetum diffusum</i> D.Don                   | Equisetaceae  | CAPN_2033999                 | OneKP |
| <i>EdiKAN6</i>  | <i>Equisetum diffusum</i> D.Don                   | Equisetaceae  | CAPN_2039666                 | OneKP |
| <i>EhyKAN1</i>  | <i>Equisetum hyemale</i> L.                       | Equisetaceae  | JVSC_2013610                 | OneKP |
| <i>EhyKAN2</i>  | <i>Equisetum hyemale</i> L.                       | Equisetaceae  | JVSZ_2131030                 | OneKP |
| <i>EhyKAN3</i>  | <i>Equisetum hyemale</i> L.                       | Equisetaceae  | JVSC_2014696                 | OneKP |
| <i>PiglKAN1</i> | <i>Pilularia globulifera</i> L.                   | Marsiliaceae  | KIIX_2089319                 | OneKP |
| <i>PiglKAN2</i> | <i>Pilularia globulifera</i> L.                   | Marsiliaceae  | KIIX_2011267                 | OneKP |
| <i>OsmKAN</i>   | <i>Osmunda</i> sp. L.                             | Osmundaceae   | UOMY_2081413                 | OneKP |
| <i>ViliKAN1</i> | <i>Vittaria lineata</i> (L.) Sm.                  | Pteridaceae   | SKYV_2017962                 | OneKP |
| <i>ViliKAN2</i> | <i>Vittaria lineata</i> (L.) Sm.                  | Pteridaceae   | SKYV_2017658                 | OneKP |
| <i>BlspKAN1</i> | <i>Blechnum spicant</i> (L.) Sm.                  | Blechnaceae   | AFPO_2068439                 | OneKP |
| <i>BlspKAN2</i> | <i>Blechnum spicant</i> (L.) Sm.                  | Blechnaceae   | AFPO_2073137                 | OneKP |
| <i>BlspKAN3</i> | <i>Blechnum spicant</i> (L.) Sm.                  | Blechnaceae   | AFPO_2075041                 | OneKP |
| <i>CracKAN1</i> | <i>Cryptogramma acrostichoides</i> R.Br.          | Adiantaceae   | WQML_20000652                | OneKP |
| <i>CracKAN2</i> | <i>Cryptogramma acrostichoides</i> R.Br.          | Adiantaceae   | WQML_2013575                 | OneKP |
| <i>CerKAN1</i>  | <i>Ceratopteris thalictroides</i> (L.) Brongn.    | Pteridaceae   | PIVW_2013269                 | OneKP |
| <i>CerKAN2</i>  | <i>Ceratopteris thalictroides</i> (L.) Brongn.    | Pteridaceae   | PIVW_2013269                 | OneKP |
| <i>CerKAN3</i>  | <i>Ceratopteris thalictroides</i> (L.) Brongn.    | Pteridaceae   | PIVW_2012454                 | OneKP |
| <i>CumaKAN</i>  | <i>Culcita macrocarpa</i> C. Presl                | Culcitaceae   | PNZO_2143811                 | OneKP |
| <i>PoheKAN</i>  | <i>Polypodium hesperium</i> Maxon                 | Polypodiaceae | ZRAR_2034727                 | OneKP |
| <i>PoacKAN</i>  | <i>Polystichum acrostichoides</i> (Michx.) Schott | Polypodiaceae | FQGQ_2073335                 | OneKP |
| <i>WoscKAN</i>  | <i>Woodsia scopulina</i> D.C.Eaton                | Woodsiaceae   | YJJY_2075370                 | OneKP |
| <i>CeriKAN1</i> | <i>Ceratopteris richardii</i> Brongn.             | Pteridaceae   | iOHQ_Cfern/c/23/f1p123/12935 |       |
| <i>CeriKAN2</i> | <i>Ceratopteris richardii</i> Brongn.             | Pteridaceae   | iOHQ_Cfern/c/23/f1p123/10643 |       |

|               |                                               |
|---------------|-----------------------------------------------|
| SM-KAN1f      | ATGGAGATTTCCAATGCGGCAGCAG                     |
| SM-KAN1r      | GGAAGAGCTTGCATCAAACAAGGC                      |
| SM-KANrT7     | CTAATACGACTCACTATAGGGGGAAGAGCTTGCATCAAACAAGGC |
| SM-KAN2f      | ATGGAAATGCCCATCAGGCTC                         |
| SM-KAN2r      | CTTCACGGGCAATTTGGAGATG                        |
| SM-KAN2rT7    | CTAATACGACTCACTATAGGGCTTCACGGGCAATTTGGAGATG   |
| EhyKAN1f      | GAATGGTATAGAACTAGCCGG                         |
| EhyKAN1r      | CGAAGACGCAGGTTATTGTGG                         |
| EhyKAN1rT7    | CTAATACGACTCACTATAGGGCGAAGACGCAGGTTATTGTGG    |
| EhyKAN2f      | CTTCCACAGATCTCTGCTTAGC                        |
| EhyKAN2r      | GGTAGCTTTGACAGGAATGG                          |
| EhyKAN2T7     | CTAATACGACTCACTATAGGGGGTAGCTTTGACAGGAATGG     |
| EhyKAN3fwd    | catcatccatcatgagttatg                         |
| EhyKAN3rev    | cttaggaacctgggctgg                            |
| EhyKAN3revISH | CTTAATACGACTCACTATAGGGcttaggaacctgggctgg      |
